# Supplementary material
Source: Royal Society of Chemistry journal article supplement (doi:10.1039/d5ta07993d)
Supplement: d5ta07993d1.pdf [file d5ta07993d1.pdf]

## Supporting Information

for

### **Influence of Current Collector Materials on the Electrochemical Performance of Aqueous Zinc-Ion Batteries**

Iman P. Pinnock,<sup>1</sup> Yujia Fan,<sup>1</sup> Ivan P Parkin,<sup>2,\*</sup> Buddha Deka Boruah<sup>1,\*</sup>

<sup>1</sup>Institute for Materials Discovery (IMD), University College London (UCL), London WC1E  
7JE, UK

<sup>2</sup>Department of Chemistry, University College London (UCL), London WC1H 0AJ, UK

Corresponding authors: Prof. Ivan P. Parkin: [i.p.parkin@ucl.ac.uk](mailto:i.p.parkin@ucl.ac.uk)

Dr. Buddha Deka Boruah: [b.boruah@ucl.ac.uk](mailto:b.boruah@ucl.ac.uk)

## Supplementary Results

**Figure S1a** and **b** displays SEM images of VO<sub>2</sub> (B) nanorods fabricated via hydrothermal synthesis, at different magnifications. Flaky VO<sub>2</sub> (B) rods can be seen in **Figure S1a** clustered together, which is further highlighted in **Figure S1b** as at the higher magnification you can see the individual nanorods within the cluster.

A Raman spectrum of the material was obtained (**Figure S1c**), from which all the expected Raman peaks were visible.<sup>1,2</sup> The peaks at 140.9 cm<sup>-1</sup> and 190.8 cm<sup>-1</sup> correspond to the layered lattice structure. The peaks at 281.5 cm<sup>-1</sup> and 405.8 cm<sup>-1</sup> are attributed to V=O bending vibrations, while the 688.5 cm<sup>-1</sup> peak arises from the V–O–V stretching mode associated with corner-shared oxygens of two pyramids. The 990.6 cm<sup>-1</sup> peak is assigned to the stretching vibration of the terminal V=O bond.<sup>1</sup>

X-ray diffraction measurements were taken to further ensure the correct material has been synthesised. The XRD spectra (**Figure S1d**) for the VO<sub>2</sub> (B) nanorods produced the expected peaks, with the corresponding planes indicated, when compared to the MDI Jade XRD data base. The characteristic peaks for VO<sub>2</sub> (B) are observed at  $2\theta = 14.4^\circ, 15.4^\circ, 25.4^\circ, 29.0^\circ, 30.2^\circ, 44.2^\circ, 45.1^\circ, \text{ and } 49.5^\circ$ , corresponding to the (001), (200), (110), (002), ( $-401$ ), (003), ( $-601$ ), and (020) Miller indices, respectively.<sup>3</sup> These are the strong peaks, with every peak intensity being above 5, which coupled with the presence of the two peaks at 14° and 15° (approx.), confirm that the material is VO<sub>2</sub> (B). The desired phase was successfully achieved, as every peak with an intensity above 5 is present and the characteristic peaks at approx. 14° and 15° are clearly visible, confirming that B phase has been synthesised as these peaks are absent in XRD spectra of other VO<sub>2</sub> (B) phases.<sup>4</sup> Moreover, there was no V<sub>2</sub>O<sub>5</sub> left over or formed, as though the XRD patterns are similar, VO<sub>2</sub> (B) shows its strongest intensity at the (110) peak, whereas V<sub>2</sub>O<sub>5</sub> exhibits the highest intensity at (001).<sup>5</sup> The hydrothermally synthesised VO<sub>2</sub> (B) also displays sharp peaks, demonstrating superior crystallinity.<sup>6,7</sup>

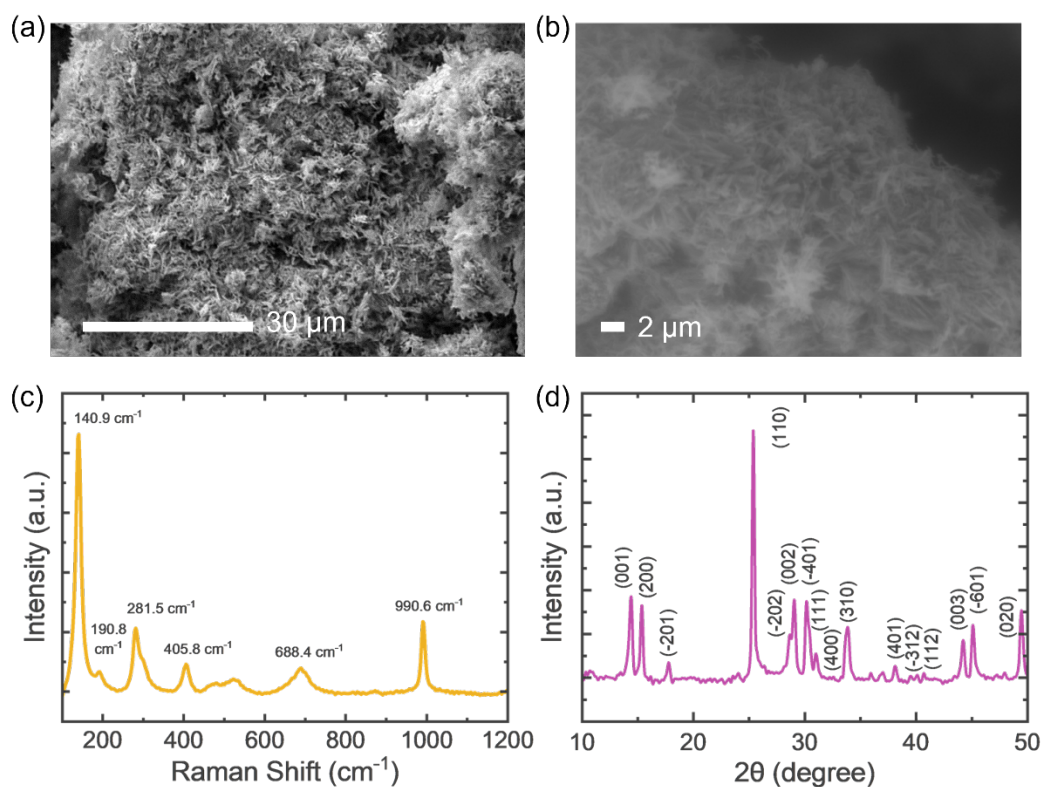

**Figure S1.** Characterisations of  $\text{VO}_2(\text{B})$ , cathode material; SEM images of  $\text{VO}_2(\text{B})$  at (a) normal and (b) high magnification. (c) Raman spectrum and d) XRD spectrum.

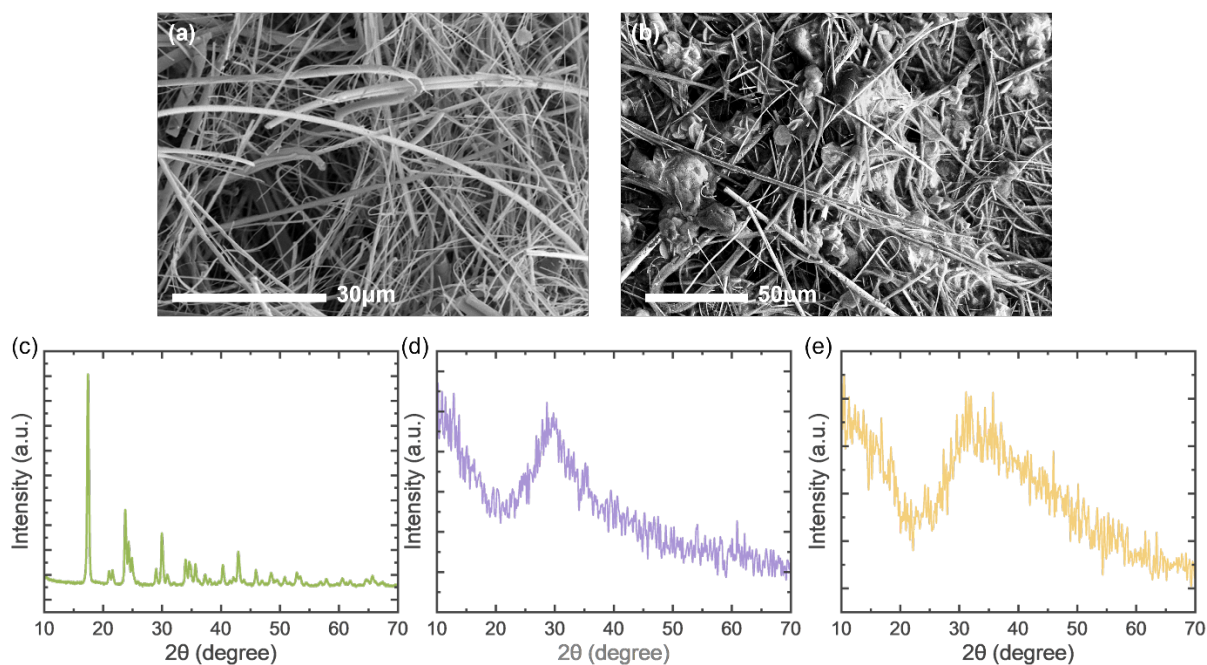

**Figure S2.** SEM images of (a) the pristine separator and (b) the separator with electrolyte used in the ZIBs assembled and tested. XRD spectra of (c)  $\text{Zn}(\text{CF}_3\text{SO}_3)_2$  salt, (d) pristine separator and (e) separator with electrolyte solution dropped on top.

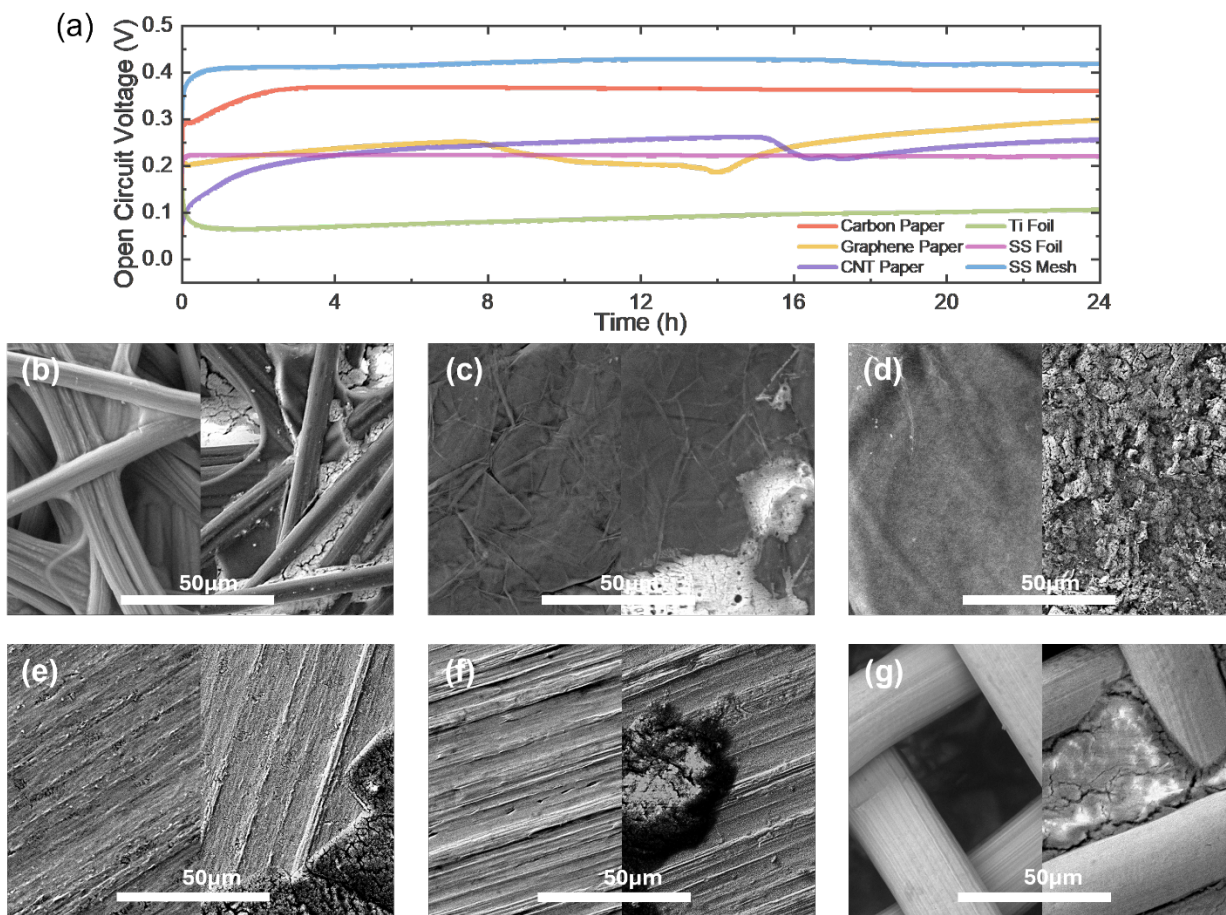

**Figure S3.** (a) OCV measurement of current collectors for 24 hours with no applied voltage. SEM images of the pristine current collectors before (left) and after (right) the measurement; (b) carbon paper, (c) graphene paper, (d) CNT paper, (e) titanium foil, (f) stainless steel foil and (g) stainless steel mesh.

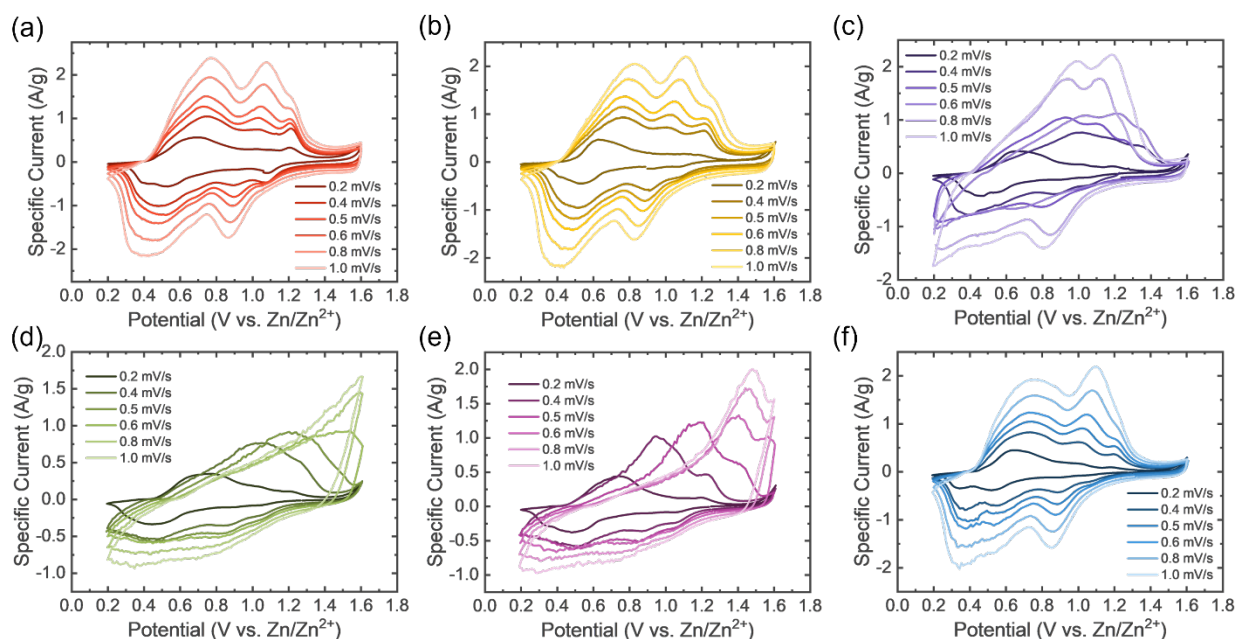

**Figure S4.** CV curves of each current collector; (a) carbon paper, (b) graphene paper, (c) CNT paper, (d) titanium foil, (e) stainless steel foil and (f) stainless steel mesh.

| Current Collector Material | Capacity Retention |
|----------------------------|--------------------|
| Carbon Paper               | 83.6%              |
| Graphene Paper             | 40.0%              |
| CNT Paper                  | 0.00%              |
| Titanium Foil              | 49.4%              |
| Stainless Steel Foil       | 22.7%              |
| Stainless Steel Mesh       | 93.3%              |

**Table S1** – Capacity retention of cells with different current collectors after long term cycling for 1000 cycles at 2000 mA/g.

## References

- 1 H. F. Xu, Y. Liu, N. Wei and S. W. Jin, *Optik (Stuttg)*, 2014, **125**, 6078–6081.
- 2 J. Chen, B. Xiao, C. Hu, H. Chen, J. Huang, D. Yan and S. Peng, *ACS Appl Mater Interfaces*, 2022, **14**, 28760–28768.
- 3 MDI Materials Data, 2019, preprint, Pro.
- 4 B. R. An, G. D. Lee, D. H. Son, S. H. Lee and S. S. Park, *Applied Chemistry for Engineering*, 2013, **24**, 611–615.
- 5 C. Londoño Calderón, C. Vargas Hernandez and J. Jurado, *Revista Mexicana de Fisica*, 2010, **56**, 411–415.
- 6 B. Deka Boruah, A. Mathieson, S. K. Park, X. Zhang, B. Wen, L. Tan, A. Boies and M. De Volder, *Adv Energy Mater*, 2021, **11**, 2100115.
- 7 S. Milošević, I. Stojković, S. Kurko, J. G. Novaković and N. Cvjetičanin, *Ceram Int*, 2012, **38**, 2313–2317.
